# Supplementary material for: Long-term Follow-up and Correlative Analysis of Two Phase II Trials of Rituximab and Lenalidomide Followed by Continuous Lenalidomide in Untreated and Relapsed/Refractory Indolent Lymphoma
Source: Oxford University Press journal article supplement (doi:10.1158/1078-0432.ccr-20-4622), 2021-06-04
Supplement: 10780432ccr204622-sup-256234_3_supp_7090882_qssx7s.docx [file 10780432ccr204622-sup-256234_3_supp_7090882_qssx7s.docx]

**Supplementary Table 2- Mixed Effect Linear Regression Model**

| Cell or MFI | *t* p | RESP p | Pt eff p |
| --- | --- | --- | --- |
| CXCL-10 | 6.2e-08 | 0.76 | 2e-9 |
| IFN- | 0.16 | 2.5e-2 | 9.2e-3 |
| IL-2 | 2.4e-13 | 0.36 | 2.2e-2 |
| IL-10 | <2e-16 | 0.96 | 2.1e-6 |
| IL-1b | 0.62 | 0.85 | 4.4e-4 |
| IL-6 | 2.2e-4 | 0.29 | 1.1e-4 |
| IL-8 | 1.5e-05 | 0.85 | 2.5e-9 |
| TNF | <2e-16 | 0.87 | 7.5e-08 |
| IL-12 | 0.021 | 0.53 | 1.2e-3 |
| GM-CSF | 1.7e-05 | 0.058 | 0.54 |
| *****  results are from 2 independently acquired datasets | | | |
