# Supplementary material for: Long-term Follow-up and Correlative Analysis of Two Phase II Trials of Rituximab and Lenalidomide Followed by Continuous Lenalidomide in Untreated and Relapsed/Refractory Indolent Lymphoma
Source: Oxford University Press journal article supplement (doi:10.1158/1078-0432.ccr-20-4622), 2021-06-04
Supplement: 10780432ccr204622-sup-256234_3_supp_7090883_qsgx7g.docx [file 10780432ccr204622-sup-256234_3_supp_7090883_qsgx7g.docx]

| Cell or MFI | *t* p | RESP p | Pt eff p | Resid p | *t* p.adj | RESP p.adj | Pt p.adj |
| --- | --- | --- | --- | --- | --- | --- | --- |
| IFN- + CD4+ T cells | 0.000081 | 0.92 | 0.00058 | 0.65 | 0.00162 | 1 | 0.0116 |
| GranB+ CD8+ T cells | 0.00010 | 0.00053 | 0.36 | 0.67 | 0.002 | 0.0106 | 7.2 |
| PD1+ CD8+ T cells | 0.00064 | 0.26 | 0.00012 | 0.36 | 0.0128 | 1 | 0.0024 |
| CD107a+ CD8 T cells | 0.0057 | 0.11 | 0.045 | 0.55 | 0.114 | 1 | 0.9 |
| CD107a+ iNKT cells | 0.0063 | 0.29 | 0.081 | 0.000019 | 0.126 | 1 | 1.62 |
| CD107a+ NKT cells | 0.014 | 0.45 | 0.00051 | 0.0016 | 0.28 | 1 | 0.0102 |
| Tfh cells | 0.020 | 0.96 | 0.00026 | 0.0000041 | 0.4 | 1 | 0.0052 |
| CD107a+ NK cells | 0.024 | 0.12 | 0.000046 | 0.000011 | 0.48 | 1 | 0.00092 |
| NK cells | 0.027 | 0.057 | 0.00067 | 0.000018 | 0.54 | 1 | 0.0134 |
| iNKT cells | 0.030 | 0.56 | 0.000016 | 4.2e-8 | 0.6 | 1 | 0.00032 |
| Tregs | 0.031 | 0.71 | 0.016 | 0.00043 | 0.62 | 1 | 0.32 |
| GranB+ NK cells | 0.046 | 0.017 | 0.044 | 0.000026 | 0.92 | 0.34 | 0.88 |
| T cells | 0.83 | 0.0025 | 0.25 | 0.024 | 1 | 0.05 | 5 |
| CD4+ T cells | 0.59 | 0.22 | 0.0049 | 0.63 | 1 | 1 | 0.098 |
| PD1+ CD4+ T cells | 0.84 | 0.68 | 0.011 | 0.79 | 1 | 1 | 0.22 |
| Mem Tregs | 0.079 | 0.62 | 0.0091 | 0.000080 | 1 | 1 | 0.182 |
| Sup Tregs | 0.12 | 0.62 | 0.0035 | 0.00033 | 1 | 1 | 0.07 |
| NKT cells | 0.32 | 0.51 | 0.035 | 0.0000014 | 1 | 1 | 0.7 |
| GranB+ NKT cells | 0.15 | 0.30 | 2.5e-8 | 0.00039 | 1 | 1 | 0.0000005 |
| GranB+ iNK T cells | 0.093 | 0.40 | 0.0000028 | 2.1e-9 | 1 | 1 | 0.000056 |
| Ratio CD4+ to CD8+ T cells | 0.17 | 0.72 | 0.0044 | 0.64 | 1 | 1 | 0.088 |
| IFN- MFI CD4+ T cell | 5.6e-8 | 0.21 | 0.52 | 0.47 | 0.00000112 | 1 | 1 |
| ***** RESP = response, t = time, Resid = residuals, Pt eff = patient effect, p.adj = Bonferroni adjusted p value | | | | | | | |
